# Supplementary material for: Plasmids of Distinct IncK Lineages Show Compatible Phenotypes
Source: PubMed Central journal article supplement (PMC5328535; doi:10.1128/aac.01954-16), 2017-02-23
Supplement: AAC.01954-16_zac003175976s1.pdf [file AAC.01954-16_zac003175976s1.pdf]

Supplementary table S1 Primers used in this study

| Primer name               | Primer sequence         | Target                                    | Reference  |
|---------------------------|-------------------------|-------------------------------------------|------------|
| K/B FW                    | gcggtccggaagccagaaaac   | RNAI                                      | (1)        |
| K RV                      | tctttcacgagcccgccaaa    |                                           | (1)        |
| K/B fv new                | aggatccgggaagtgcagaaaac | RNAI                                      | this study |
| K rv new                  | tctttcacgaccccgccaaa    |                                           | this study |
| K1fv                      | atcgtcaggatccgggaagtc   | RNAI and <i>repY</i> gene                 | this study |
| K1rv                      | gagcgattgtgccgtgtatt    |                                           | this study |
| K2fv                      | atgctcgcggtccggaagcc    | RNAI and <i>repY</i> gene                 | this study |
| K2rv                      | gtgccgtgcgtaatgcactgcaa |                                           | this study |
| CMY-2-F                   | atgatgaaaaatcgttgctgc   | <i>bla</i> <sub>CMY</sub> gene            | (2)        |
| CMY-2-R                   | gcttttcaagaatgcgccagg   |                                           | (2)        |
| TEM-F                     | gcggaaccctatttg         | <i>bla</i> <sub>TEM</sub> gene            | (3)        |
| TEM-R                     | accaatgcttaatcagtgag    |                                           | (3)        |
| CTX-M-9-1F                | tggtgacaaaagagagtgcacg  | <i>bla</i> <sub>CTX-M-group-9</sub> genes | (4)        |
| CTX-M-9-4R                | tcacagcccttcggcgat      |                                           | (4)        |
| CTX-M-9 <sub>792</sub> F  | ctattttaccagccgcagc     | <i>bla</i> <sub>CTX-M-14</sub> gene       | (5)        |
| CTX-M-9 <sub>1029</sub> R | gttatggagccacggttgat    |                                           | (5)        |
| ssb fv                    | tggtgctgttcggaagctc     | <i>ssb</i> gene                           | this study |
| ssb rv                    | ccttacgtccacggcctttc    |                                           | this study |
| ISEcp1A                   | gcaggtcttttctgctcc      | ISEcp1B transposase                       | (6)        |
| ISEcp1B                   | tttccgcagcaccgtttgc     |                                           | (6)        |

## References

1. Carattoli, A, Bertini, A, Villa, L, Falbo, V, Hopkins, KL, Threlfall, EJ. 2005. Identification of plasmids by PCR-based replicon typing. *J. Microbiol. Methods*. **63**:219-228.
2. Dierikx, C, van Essen-Zandbergen, A, Veldman, K, Smith, H, Mevius, D. 2010. Increased detection of extended spectrum beta-lactamase producing *Salmonella enterica* and *Escherichia coli* isolates from poultry. *Vet. Microbiol*. **145**:273-278
3. Olesen, I, Hasman, H, Aarestrup, FM. 2004. Prevalence of beta-lactamases among ampicillin-resistant *Escherichia coli* and *Salmonella* isolated from food animals in Denmark. *Microb. Drug Resist.* **10**:334-340.
4. Paauw, A, Fluit, AC, Verhoef, J, IJverstein-van hall, MA. 2006. Enterobacter cloacae outbreak and emergence of quinolone resistance gene in Dutch hospital. *Emerg. Infect. Dis.* **12**: 807-812
5. Dierikx, CM, van Duijkeren, E, Schoormans, AHW, van Essen-Zandbergen, A, Veldman, K, Kant, A, Huijsdens, XW, van der Zwaluw, K, Wagenaar, JA, Mevius, DJ. 2012. Occurrence and characteristics of extended-spectrum-β-lactamase- and AmpC-producing clinical isolates derived from companion animals and horses. *J Antimicrob Chemother.* **67**:1368-74
6. Poirel, L, Decusser, JW, Nordmann, P. 2003. Insertion sequence ISEcp1B is involved in expression and mobilization of a *bla*<sub>CTX-M</sub> beta-lactamase gene. *Antimicrob. Agents Chemother.* **47**:2938-2945.
